# Supplementary material
Source: ML conference proceedings conference paper supplement (https://openreview.net/forum?id=kdzFuqYsNQ)

# Autocorrelation in direction of greatest variance

vABPS  
pSBPS

kernel layer 1

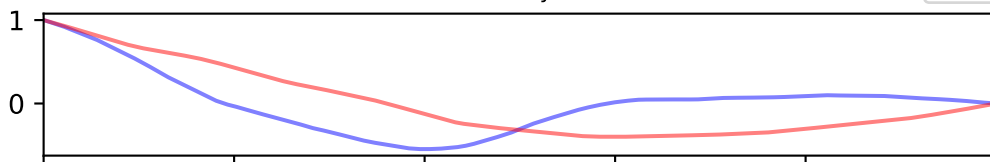

kernel layer 2

autocorrelation

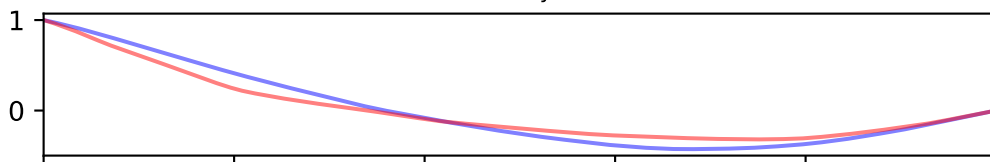

kernel layer 3

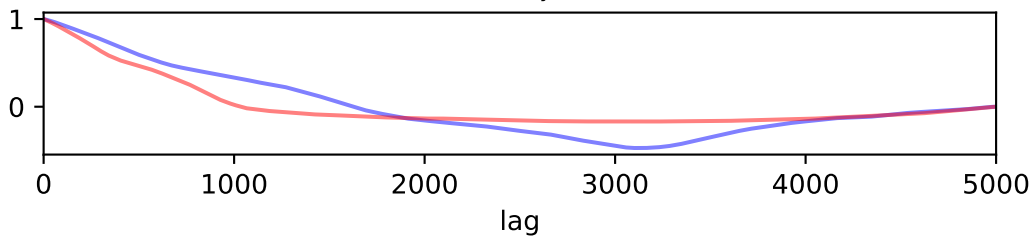

Supplement: supplementary_material [file attachment]
